# Supplementary material for: Moo19 and B2: Structures of Schitoviridae podophages with T = 9 geometry and tailspikes with esterase activity
Source: PubMed Central journal article supplement (PMC11654681; doi:10.1126/sciadv.adt0022), 2024-12-18
Supplement: sciadv.adt0022_sm.pdf [file sciadv.adt0022_sm.pdf]

Supplementary Materials for  
**Moo19 and B2: Structures of *Schitoviridae* podophages with  $T = 9$  geometry  
and tailspikes with esterase activity**

Sundharraman Subramanian *et al.*

Corresponding author: Kristin N. Parent, [kparent@msu.edu](mailto:kparent@msu.edu)

*Sci. Adv.* **10**, eadt0022 (2024)  
DOI: 10.1126/sciadv.adt0022

**This PDF file includes:**

Tables S1 to S4

## Supplementary Materials

**Supplementary Table 1: Bacterial Strains for Host Range Analysis**

| Species                       | Strain  | Reference                                                                            |
|-------------------------------|---------|--------------------------------------------------------------------------------------|
| <i>Escherichia coli</i>       | REL606  | Jeong et al., 2009 (71)                                                              |
|                               | BW25113 | Grenier et al., 2014 (72)                                                            |
|                               | C122    | Fane and Hayachi, 1991 (73)                                                          |
| <i>Salmonella</i>             | MZ1597  | Porwollik et al., 2014 (74)                                                          |
|                               | DB7136  | Winston and Miller, 1979 (75)                                                        |
| <i>Bacillus subtilis</i>      | 1A1299  | Borriss et al., 2017 (76); Hardwood and Wipat, 1996 (77);<br>Kunst et al., 1997 (78) |
| <i>Shigella sonnei</i> *      | N/A     | Doore et al., 2018 (24)                                                              |
| <i>Shigella boydii</i> *      | N/A     | Doore et al., 2018 (24)                                                              |
| <i>Shigella dysenteriae</i> * | N/A     | Doore et al., 2018 (24)                                                              |
| <i>Shigella flexneri</i>      | CFS100  | Marman et al., 2014 (79)                                                             |
|                               | PE577   | Macpherson et al., 1991 (80)                                                         |

The following bacterial strains were used for isolation of phages and description of phage host range: *Shigella flexneri*, *Escherichia coli*, *Salmonella*, and *Bacillus subtilis*.

Phages were initially grown in media containing 10mM calcium chloride and 10 mM magnesium chloride. An asterisk (\*) indicates the pathogenic strains of *Shigella flexneri*, *Shigella sonnei*, *Shigella boydii*, and *Shigella dysenteriae*.

**Supplementary Table 2 Bacterial Strains for Receptor Binding Analysis**

| Strain                                     | Reference                   |
|--------------------------------------------|-----------------------------|
| <i>ompA</i> -                              | This study                  |
| <i>ompC</i> -                              | This study                  |
| <i>ompA</i> -/ <i>ompC</i> -               | This study                  |
| <i>gtr</i> -                               | Teh, M.Y. et al., 2020 (53) |
| <i>gtr</i> -/ <i>oacD</i> -                | This study                  |
| <i>gtr</i> -/ <i>oacB</i> -                | This study                  |
| <i>gtr</i> -/ <i>oacD</i> -/ <i>oacB</i> - | This study                  |
| <i>oacB</i> -                              | This study                  |
| <i>wecD</i> -                              | This study                  |
| <i>wecC</i> -                              | This study                  |
| <i>waaC</i>                                | This study                  |
| <i>waaL</i> -                              | This study                  |
| <i>waaG</i> -                              | This study                  |

Bacterial knockouts made targeting the LPS and the o-antigen region of the LPS were made using lambda red recombineering techniques described in Datsenko and Wanner, 2000. Both LPS knockouts and knockouts in the o-antigen region of the LPS are further described in *Shigella flexneri* in Teh et al., 2020 (53) and Doore et al., 2021 (49), respectively. Outer membrane protein knockouts were made as described in Parent et al., 2014 (15), and Tinney et al. 2022 (26).

**Supplementary Table 3: Cryo-EM data collection, refinement and validation statistics for Moo19**

| Map                                    | Moo19 Capsid  | Moo19 Tail    | Moo19 Virion  | Moo19 Gp82   |
|----------------------------------------|---------------|---------------|---------------|--------------|
| EMD Identifier                         | EMD- 46622    | EMD- 46623    | EMD- 46625    | EMD- 46624   |
| PDB Identifier                         | 9D7Z          | 9D80          | -----         | 9D81         |
| <b>Data collection and processing</b>  |               |               |               |              |
| Magnification                          | 53,000        | 53,000        | 53,000        | 130,000      |
| Voltage (kV)                           | 300           | 300           | 300           | 200          |
| Electron exposure (e-/Å <sup>2</sup> ) | 33            | 33            | 33            | 43           |
| Defocus range (µm)                     | -0.8 to - 3.0 | -0.8 to - 3.0 | -0.8 to - 3.0 | -0.7 to -2.1 |
| Pixel size (Å)                         | 0.816         | 0.816         | 0.816         | 0.886        |
| Symmetry imposed                       | I1            | C12           | C1            | C3           |
| Number of micrographs                  | 5,241         | 5,241         | 5,241         | 7,726        |
| Number of particles                    | 95,783        | 95,783        | 95,783        | 563,035      |
| Map resolution (Å)                     | 3.6           | 3.7           | 4.3           | 2.4          |
| FSC <sub>0.143</sub>                   |               |               |               |              |
| <b>Refinement</b>                      |               |               |               |              |
| R.m.s. deviations                      |               |               |               |              |
| Bond lengths (Å)                       | 0.006         | 0.004         | N/A           | 0.006        |
| Bond angles (°)                        | 1.042         | 0.683         |               | 0.888        |
| Validation                             |               |               |               |              |
| MolProbity score                       | 2.28          | 1.72          | N/A           | 2.08         |
| Clashscore                             | 9.95          | 5.05          |               | 14.08        |
| Poor rotamers (%)                      | 2.33          | 1.27          |               | 1.41         |
| Ramachandran plot                      |               |               |               |              |
| Favored (%)                            | 92.19         | 94.46         | N/A           | 95.51        |
| Allowed (%)                            | 7.64          | 5.16          |               | 3.85         |
| Disallowed (%)                         | 0.17          | 0.38          |               | 0.64         |
| CC (volume)                            | 0.80          | 0.71          | N/A           | 0.92         |

N/A = Not Applicable as there is no associated PDB file

**Supplementary Table 4: Cryo-EM data collection, refinement and validation statistics for B2**

| Map                                    | B2 Capsid    | B2 Tail      | B2 Virion    | B2 Gp82      |
|----------------------------------------|--------------|--------------|--------------|--------------|
| EMD Identifier                         | EMD- 46626   | EMD- 46627   | EMD- 46629   | EMD- 46628   |
| PDB Identifier                         | 9D82         | 9D83         | ---          | 9D84         |
| <b>Data collection and processing</b>  |              |              |              |              |
| Magnification                          | 105,000      | 105,000      | 105,000      | 130,000      |
| Voltage (kV)                           | 300          | 300          | 300          | 200          |
| Electron exposure (e-/Å <sup>2</sup> ) | 40           | 40           | 40           | 43           |
| Defocus range (µm)                     | -0.5 to -2.0 | -0.5 to -2.0 | -0.5 to -2.0 | -0.7 to -2.1 |
| Pixel size (Å)                         | 0.834        | 0.834        | 0.834        | 0.886        |
|                                        | (unbinned)   | (unbinned)   | (unbinned)   |              |
| Symmetry imposed                       | I1           | C12          | C1           | C3           |
| Number of micrographs                  | 12,799       | 12,799       | 12,799       | 6,456        |
| Number of particles                    | 135,384      | 135,384      | 135,384      | 2,078,531    |
| Map resolution (Å)                     | 3.4          | 3.5          | 4.1          | 2.3          |
| FSC threshold 0.143                    |              |              |              |              |
| <b>Refinement</b>                      |              |              |              |              |
| R.m.s. deviations                      |              |              |              |              |
| Bond lengths (Å)                       | 0.004        | 0.004        | N/A          | 0.005        |
| Bond angles (°)                        | 0.804        | 0.694        |              | 0.733        |
| Validation                             |              |              |              |              |
| MolProbity score                       | 2.34         | 1.90         | N/A          | 1.90         |
| Clashscore                             | 16.59        | 7.18         |              | 12.17        |
| Poor rotamers (%)                      | 1.33         | 1.46         |              | 1.35         |
| Ramachandran plot                      |              |              |              |              |
| Favored (%)                            | 90.71        | 94.40        | N/A          | 96.78        |
| Allowed (%)                            | 8.59         | 5.14         |              | 3.10         |
| Disallowed (%)                         | 0.70         | 0.47         |              | 0.12         |
| CC (volume)                            | 0.85         | 0.73         | N/A          | 0.91         |

N/A = Not Applicable as there is no associated PDB file
